# Supplementary material
Source: Springer Nature journal article supplement (https://www.springermedizin.de/resource/supplementary/12885_2006_549_MOESM7_ESM.pdf/9469734)

**A**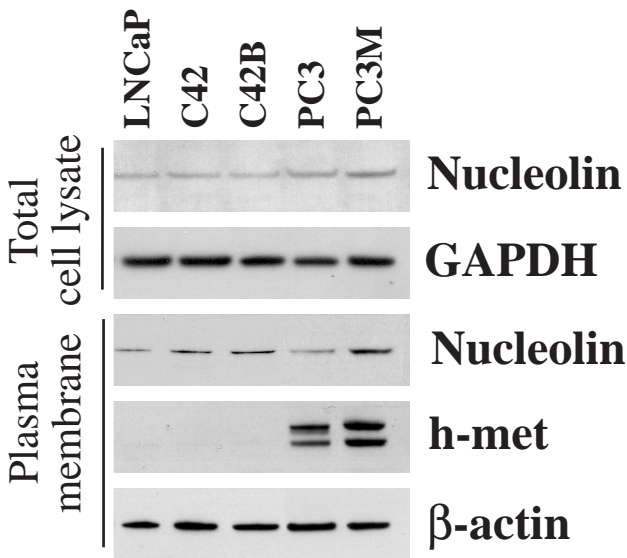**B**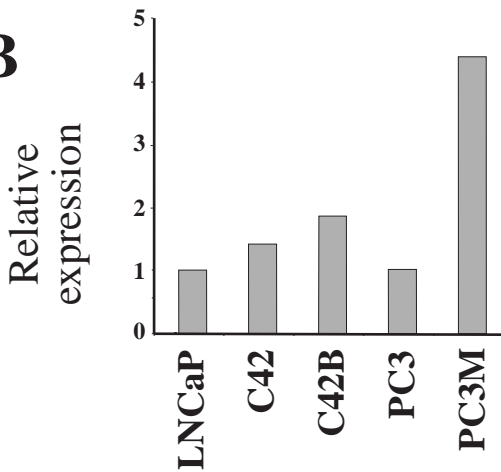

Supplement: MOESM7 [file 9469734]
